# Supplementary material for: Diabetes Distress, Intentional Hyperglycemia at Work, and Glycemic Control Among Workers With Type 1 Diabetes
Source: Oxford University Press journal article supplement (doi:10.2337/dc18-1426), 2019-02-14
Supplement: dc181426supplementarydata.pdf [file dc181426supplementarydata.pdf]

# SUPPLEMENTARY DATA

**Supplementary Table S1.** Overview of survey items.

| Scale/item                                                             | Questions                                                                                                                                                                                                                                                                                                                                                                                                                                                                                 | Response options                                                                                                                                           |
|------------------------------------------------------------------------|-------------------------------------------------------------------------------------------------------------------------------------------------------------------------------------------------------------------------------------------------------------------------------------------------------------------------------------------------------------------------------------------------------------------------------------------------------------------------------------------|------------------------------------------------------------------------------------------------------------------------------------------------------------|
| <b>Diabetes distress</b><br>(5 items, PAID-5)                          | Which of the following diabetes issues are currently a problem for you? <ul style="list-style-type: none"> <li>Feeling scared when you think about living with diabetes</li> <li>Feeling depressed when you think about living with diabetes</li> <li>Worrying about the future and the possibility of serious complications?</li> <li>Feeling that diabetes is taking up too much of your mental and physical energy every day</li> <li>Coping with complications of diabetes</li> </ul> | Respondents rated each item on a 5-point Likert scale from 'Not a problem' to 'A serious problem'                                                          |
| <b>Work-related diabetes distress</b><br>(2 items, WRDD)               | Which of the following diabetes issues are currently a problem for you? <ul style="list-style-type: none"> <li>Worrying about your ability to do your job due to your diabetes</li> <li>Becoming exhausted by the need to reconcile your work with your diabetes</li> </ul>                                                                                                                                                                                                               | Respondents rated each item on a 5-point Likert scale from 'Not a problem' to 'A serious problem'                                                          |
| <b>Intentional hyperglycaemia at work</b><br>(1 item, IHW)             | How often do you intentionally run your blood glucose levels high at work?                                                                                                                                                                                                                                                                                                                                                                                                                | Respondents rated the item on a 5-point Likert scale from 'Never' to 'Always'                                                                              |
| <b>Opportunity to self-manage type 1 diabetes at work</b><br>(4 items) | How easy or difficult is it to carry out the following activities in the workplace, to manage your diabetes: <ul style="list-style-type: none"> <li>blood glucose monitoring</li> <li>eating snacks</li> <li>insulin injections</li> <li>eating meals</li> </ul>                                                                                                                                                                                                                          | Respondents rated each item on a 4-point Likert scale from 'Very easy' to 'Very difficult'                                                                 |
| <b>Work ability score</b><br>(1 item, WAS)                             | Imagine your work ability being 10 points worth at its best. How many points would you assign to your current work ability overall?                                                                                                                                                                                                                                                                                                                                                       | 0 = 'Completely unable to work' to 10 = 'work ability at its best'                                                                                         |
| <b>Job demands</b><br>(4 items, from the Job                           | Assess to which degree you agree or disagree with the following statements:                                                                                                                                                                                                                                                                                                                                                                                                               | The respondents rate each item on a 5-point Likert scale from 'Fully agree' to 'Fully disagree'. The fourth item was reverse-scored before a sum score was |

## SUPPLEMENTARY DATA

|                                                 |                                                                                                                                                                                                                                                                                                                                                                                                                                                                                                                                                                                                                                                                                                                                                                                                                                                                                                                                                                                                                                                                                                                                                                                                                                                                                                                                                                                                                                                                                                                                  |                                                                                                                                                                                                                               |
|-------------------------------------------------|----------------------------------------------------------------------------------------------------------------------------------------------------------------------------------------------------------------------------------------------------------------------------------------------------------------------------------------------------------------------------------------------------------------------------------------------------------------------------------------------------------------------------------------------------------------------------------------------------------------------------------------------------------------------------------------------------------------------------------------------------------------------------------------------------------------------------------------------------------------------------------------------------------------------------------------------------------------------------------------------------------------------------------------------------------------------------------------------------------------------------------------------------------------------------------------------------------------------------------------------------------------------------------------------------------------------------------------------------------------------------------------------------------------------------------------------------------------------------------------------------------------------------------|-------------------------------------------------------------------------------------------------------------------------------------------------------------------------------------------------------------------------------|
| Content Questionnaire)                          | <ul style="list-style-type: none"> <li>• My job requires me to work very fast</li> <li>• My job requires me to work very hard</li> <li>• My job requires an inordinate amount of work</li> <li>• I have enough time to get my job done</li> </ul>                                                                                                                                                                                                                                                                                                                                                                                                                                                                                                                                                                                                                                                                                                                                                                                                                                                                                                                                                                                                                                                                                                                                                                                                                                                                                | calculated, with higher scores indicating greater job demands.                                                                                                                                                                |
| <b>Diabetes stigma</b><br>(19 items, DSAS-1 DK) | <p>Please state to which degree you agree or disagree with each statement:</p> <p><b>Treated differently</b></p> <ul style="list-style-type: none"> <li>• Because I have type 1 diabetes, I have been excluded by others from certain social events</li> <li>• I have been discriminated against in the workplace because I have type 1 diabetes</li> <li>• Some people see me as a lesser person because I have type 1 diabetes</li> <li>• Some people think I am unreliable because I have type 1 diabetes</li> <li>• I have been rejected by others (e.g. friends, colleagues, romantic partners) because of my type 1 diabetes</li> </ul> <p><b>Blame and judgement</b></p> <ul style="list-style-type: none"> <li>• Some people assume that it is my fault I have type 1 diabetes (e.g. I ate too much sugar, I could have prevented it)</li> <li>• Some people think that I brought type 1 diabetes on myself</li> <li>• Some people think I need insulin because I haven't looked after myself</li> <li>• Because I have type 1 diabetes, some people judge me if I eat sugary food or drinks (e.g. cakes, lollies, soft drink)</li> <li>• Some people make unfair assumptions about what I can and cannot do because of my type 1 diabetes</li> <li>• Some people think I'm irresponsible when my diabetes management isn't 'perfect'</li> </ul> <p><b>Identity concern</b></p> <ul style="list-style-type: none"> <li>• I worry what people will think if they see me injecting/blousing insulin or checking</li> </ul> | <p>Respondents rated each of the 19 items on a 5-point Likert scale from 'Strongly disagree' to 'Strongly agree'.</p> <p>The 19 items form three sub-scales: Treated differently, Blame and Judgement, Identity Concerns.</p> |

## SUPPLEMENTARY DATA

|  |                                                                                                                                                                                                                                                                                                                                                                                                                                                                                                                                                                                                                                                                                                                                                |  |
|--|------------------------------------------------------------------------------------------------------------------------------------------------------------------------------------------------------------------------------------------------------------------------------------------------------------------------------------------------------------------------------------------------------------------------------------------------------------------------------------------------------------------------------------------------------------------------------------------------------------------------------------------------------------------------------------------------------------------------------------------------|--|
|  | <p>my blood glucose in public</p> <ul style="list-style-type: none"><li>• I feel embarrassed when I have to manage my type 1 diabetes in public (e.g. check blood glucose, inject/bolus insulin refuse food, eat extra food)</li><li>• I feel self-conscious about all the tools I need to manage my type 1 diabetes (e.g. insulin pen, pump, blood glucose meter)</li><li>• To avoid negative reactions, I don't tell people I have type 1 diabetes</li><li>• I feel worried about telling people I have type 1 diabetes in case they react negatively</li><li>• I feel embarrassed about what people might think if I need help with a hypo</li><li>• If I were to inject insulin in public, people would think I was taking drugs</li></ul> |  |
|--|------------------------------------------------------------------------------------------------------------------------------------------------------------------------------------------------------------------------------------------------------------------------------------------------------------------------------------------------------------------------------------------------------------------------------------------------------------------------------------------------------------------------------------------------------------------------------------------------------------------------------------------------------------------------------------------------------------------------------------------------|--|

# SUPPLEMENTARY DATA

## Supplementary Table S2. Participant characteristics

|                                                     | N = 1030            |
|-----------------------------------------------------|---------------------|
| Gender, n (%)                                       |                     |
| Women                                               | 492 (48)            |
| Men                                                 | 538 (52)            |
| Age in years, mean±SD (range)                       | 46.01±12.08 (18-70) |
| Diabetes duration in years, mean±SD (range)         | 23.37±13.50 (0-63)  |
| HbA1c, mean±SD                                      |                     |
| Mmol/mol                                            | 60.8±11.18          |
| %                                                   | 7.7±3.2             |
| Albumin-creatinine ratio in mg/g, mean±SD           | 37.54±211.23        |
| Complications, n (%)                                |                     |
| None                                                | 545 (52.9)          |
| ≥ 1                                                 | 485 (47.1)          |
| Treatment, n (%)                                    |                     |
| Insulin pump                                        | 190 (18.5)          |
| Insulin pen                                         | 840 (81.6)          |
| WRDD, mean±SD (range)                               | 1.61±1.78 (0-8)     |
| PAID-5, mean±SD (range)                             | 7.09±4.87 (0-20)    |
| Work ability, mean±SD (range)                       | 8.65±1.56 (0-10)    |
| Intentional hyperglycemia at work, n (%)            |                     |
| Never                                               | 351 (35.1)          |
| A few times                                         | 326 (31.7)          |
| Sometimes                                           | 230 (22.3)          |
| Often                                               | 99 (9.6)            |
| Always                                              | 14 (1.4)            |
| Job demands, mean±SD (range)                        | 13.17±2.96          |
| Diabetes stigma, mean±SD (range)                    |                     |
| Blame and judgement                                 | 17.36±5.23          |
| Treated differently                                 | 9.70±3.89           |
| Identity concern                                    | 15.87±6.09          |
| Opportunity to self-manage at work, mean±SD (range) | 6.14±2.48 (4-16)    |

# SUPPLEMENTARY DATA

**Supplementary Table S3.** Spearman's coefficient for bivariate associations between key variables in the path analysis

| Variable                             | 1 | 2      | 3      | 4      | 5      | 6      | 7      | 8      | 9      | 10     |
|--------------------------------------|---|--------|--------|--------|--------|--------|--------|--------|--------|--------|
| 1 Work demands                       | 1 | 0.04** | 0.21** | 0.11*  | 0.08*  | 0.07*  | 0.13** | 0.17** | 0.10*  | 0.01   |
| 2 Work ability                       |   | 1      | -      | -      | -      | -      | -      | -      | -      | -      |
| 3 Opportunity to self-manage at work |   |        | 1      | 0.22** | 0.18** | 0.16** | 0.25** | 0.36** | 0.47** | 0.16** |
| 4 Blame and judgment                 |   |        |        | 1      | 0.27** | 0.41** | 0.21** | 0.35** | 0.39** | 0.32** |
| 5 Identity concern                   |   |        |        |        | 1      | 0.44** | 0.49** | 0.41** | 0.33** | 0.21** |
| 6 Treated differently                |   |        |        |        |        | 1      | 0.56** | 0.47** | 0.35** | 0.27** |
| 7 PAID-5                             |   |        |        |        |        |        | 1      | 0.62** | 0.34** | 0.14** |
| 8 WRDD                               |   |        |        |        |        |        |        | 1      | 0.33** | 0.08** |
| 9 IHW                                |   |        |        |        |        |        |        |        | 1      | 0.28** |
| 10 HbA1c                             |   |        |        |        |        |        |        |        |        | 1      |

Statistically not significant unless otherwise noted

\*P < 0.05

\*\* P < 0.001

Abbreviations: HbA1c, haemoglobin A1c; IHW, intentional hyperglycemia at work; PAID-5, Problem Areas in Diabetes Scale Short Form; WRDD, work-related diabetes distress
